# Supplementary material for: Astaxanthin alleviates fine particulate matter (PM2.5)-induced lung injury in rats by suppressing ferroptosis and apoptosis
Source: Royal Society of Chemistry journal article supplement (doi:10.1039/d3fo03641c), 2023-01-01

# Supplementary Figure 1

**Figure 5A-1 TFRC**

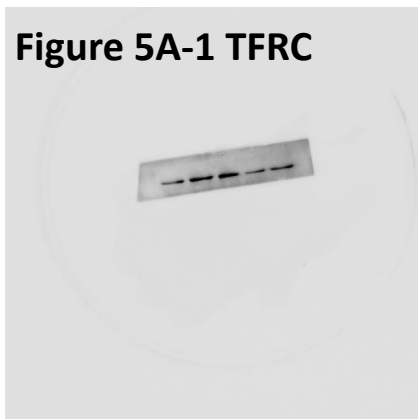

**Figure 5A-1 FTH1**

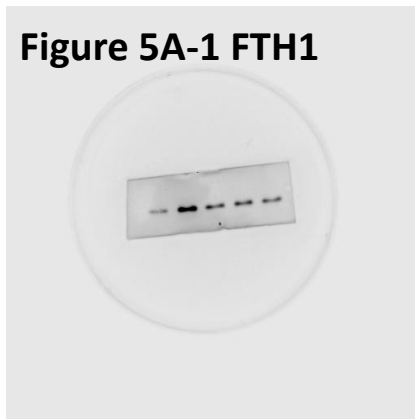

**Figure 5A-1 GAPDH**

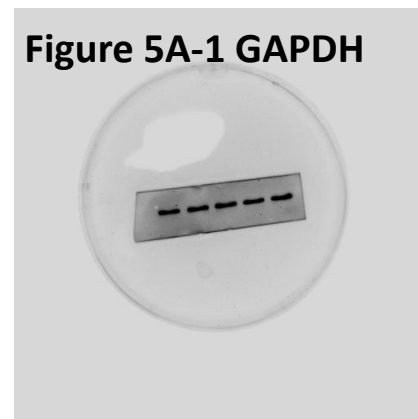

**Figure 5A-2 TFRC**

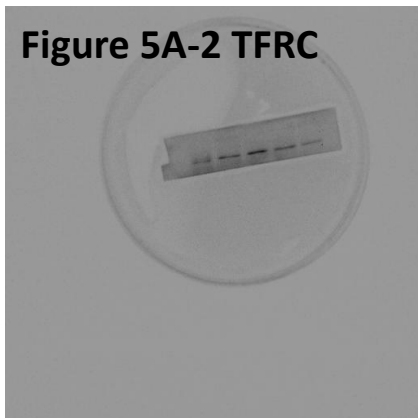

**Figure 5A-2 FTH1**

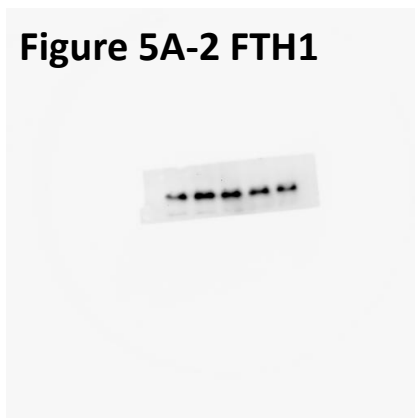

**Figure 5A-2 GAPDH**

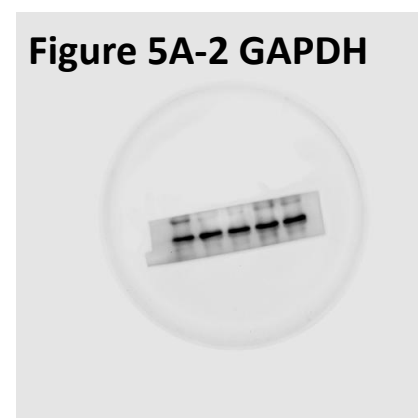

**Figure 5A-3 TFRC**

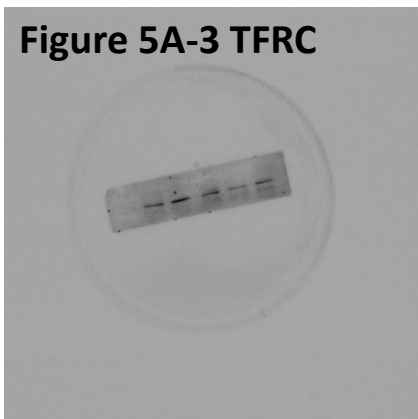

**Figure 5A-3 FTH1**

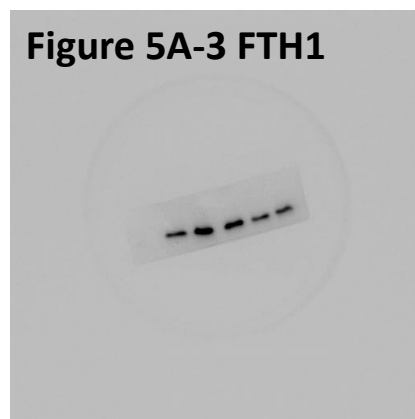

**Figure 5A-3 GAPDH**

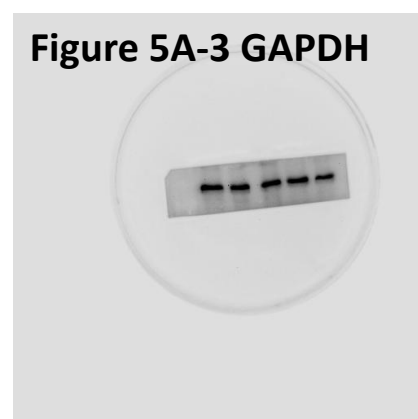

## Supplementary Figure 2

Figure 5D-1 SLC7A11

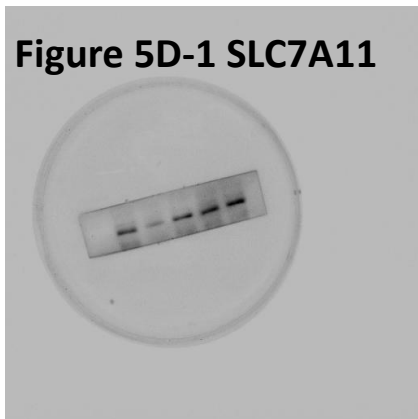

Figure 5D-1 GPX4

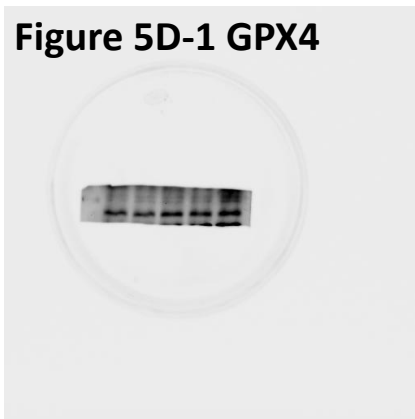

Figure 5D-1 GAPDH

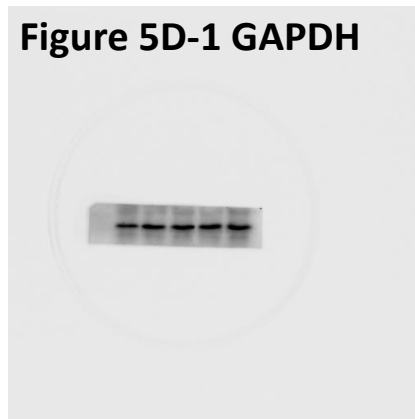

Figure 5D-2 SLC7A11

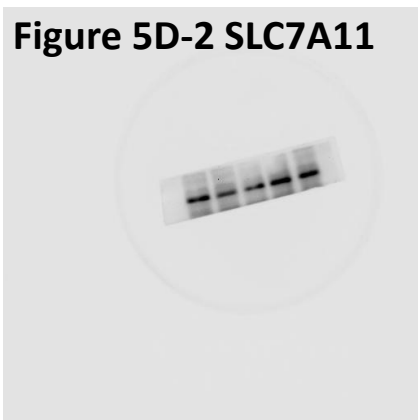

Figure 5D-2 GPX4

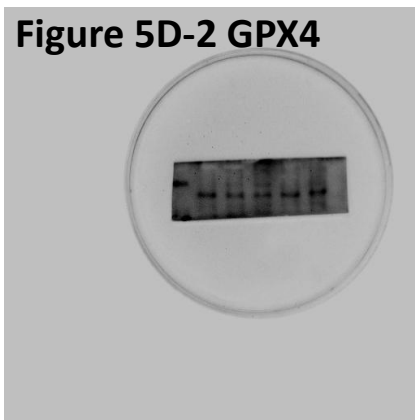

Figure 5D-2 GAPDH

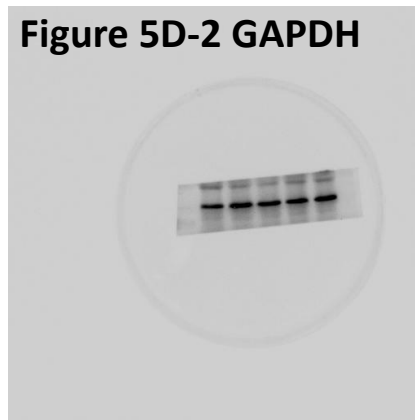

Figure 5D-3 SLC7A11

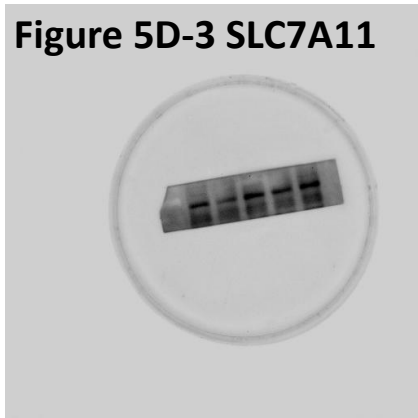

Figure 5D-3 GPX4

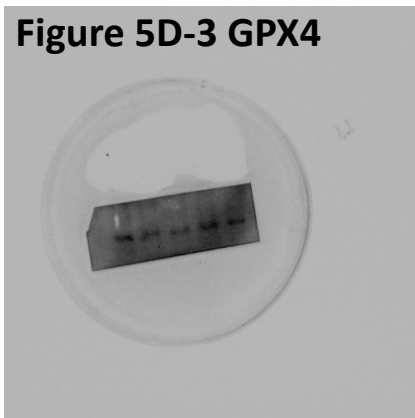

Figure 5D-3 GAPDH

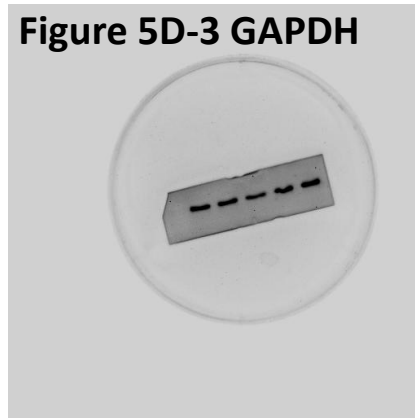

### Supplementary Figure 3

Figure 6A-1 Bax

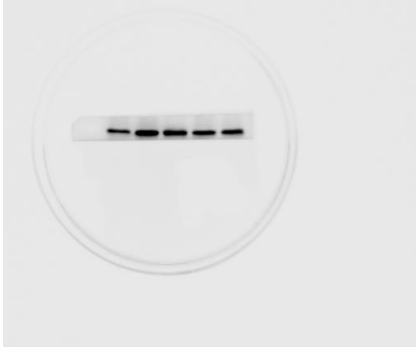

Figure 6A-1 GAPDH

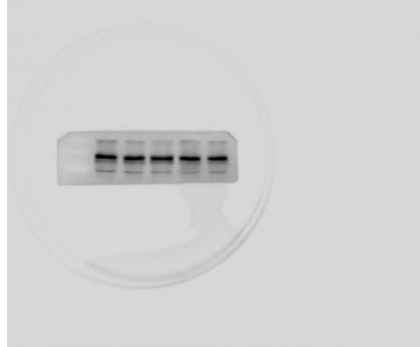

Figure 6C-1 Bcl-2

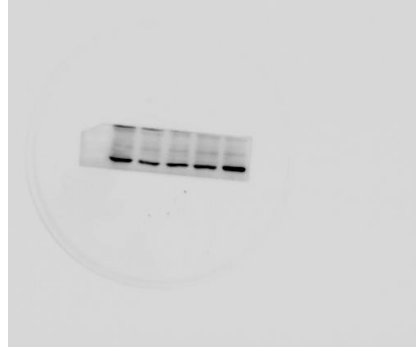

Figure 6C-1 GAPDH

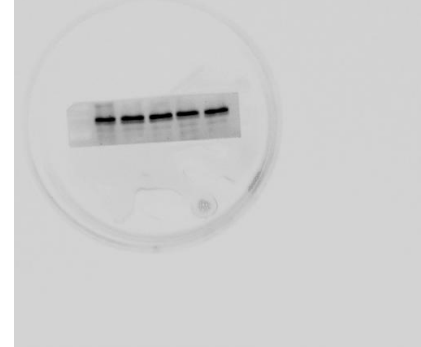

Figure 6A-2 Bax

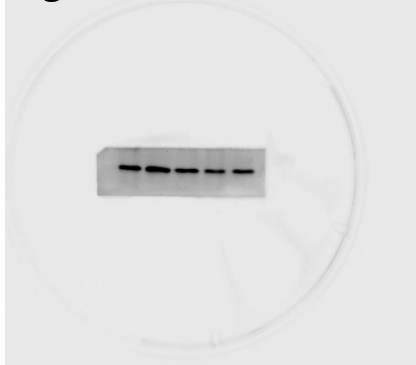

Figure 6A-2 GAPDH

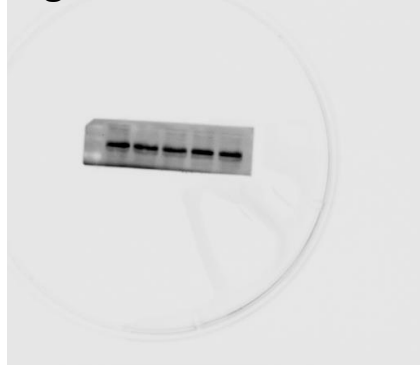

Figure 6C-2 Bcl-2

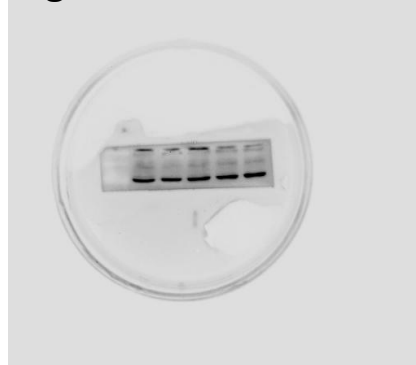

Figure 6C-2 GAPDH

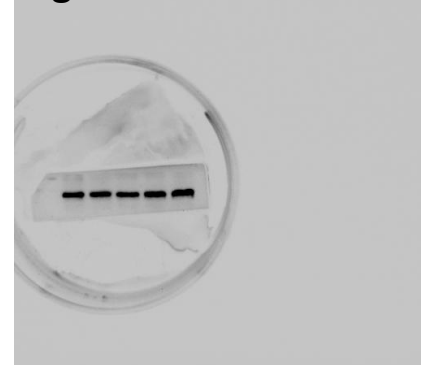

Figure 6A-3 Bax

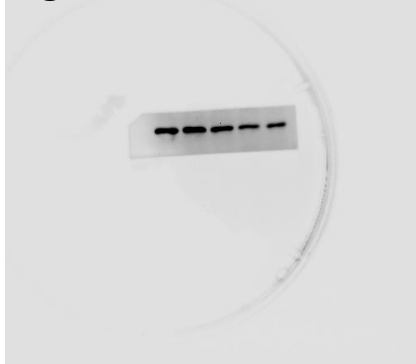

Figure 6A-3 GAPDH

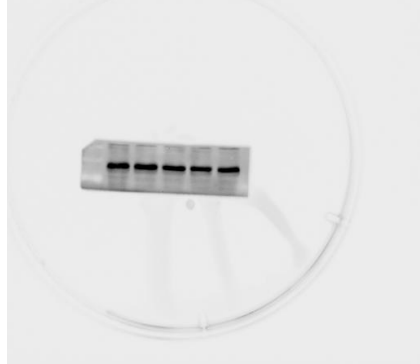

Figure 6C-3 Bcl-2

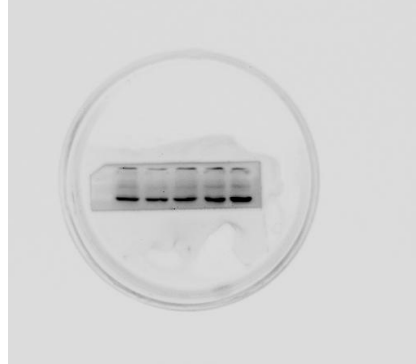

Figure 6C-3 GAPDH

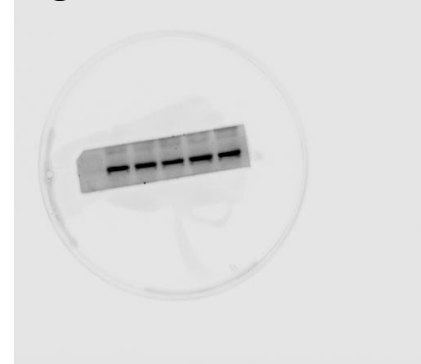

Supplement: d3fo03641c1.pdf [file d3fo03641c1.pdf]
